# Supplementary material for: Cu3N nanoparticles with both (100) and (111) facets for enhancing the selectivity and activity of CO2 electroreduction to ethylene
Source: Royal Society of Chemistry journal article supplement (doi:10.1039/d2nj02175g), 2022-01-01
Supplement: d2nj02175g1.pdf [file d2nj02175g1.pdf]

## **Cu<sub>3</sub>N Nanoparticles with Both (100) and (111) Facets for Enhancing the Selectivity and Activity of CO<sub>2</sub> Electroreduction to Ethylene**

Hongzhi Wang, Xinze Bi, Yuezhu Zhao, Zhongxue Yang, Zhaoliang Wang,\* Mingbo Wu\*

Table. S1 Comparison of the activities of Cu<sub>3</sub>N NPs with the reported catalysts for CO<sub>2</sub>RR.

| Catalyst                                                   | Electrolyte                            | Potential (vs. RHE) | Total j [mA cm <sup>-2</sup> ] | FE of ethylene | Reference |
|------------------------------------------------------------|----------------------------------------|---------------------|--------------------------------|----------------|-----------|
| 44 nm Cu nanocubes                                         | KHCO <sub>3</sub> (0.1M)               | -1.1 V              | ≈3                             | 41%            | [1]       |
| 250 nm Cu cubes on Cu foils                                | KHCO <sub>3</sub> (0.1M)               | ≈-1.03 V            | n/a                            | 48%            | [2]       |
| 240 nm Cu cubes pre-treated with O <sub>2</sub> plasma     | KHCO <sub>3</sub> (0.1M)               | -1.0 V              | ≈34.8                          | 45%            | [3]       |
| Star decahedron Cu                                         | KHCO <sub>3</sub> (0.1M)               | -0.993 V            | ≈19                            | 52.43%         | [4]       |
| Nanodeficient Cu nanosheets                                | K <sub>2</sub> SO <sub>4</sub> (0.1 M) | -1.18 V             | 58.8                           | 83.20%         | [5]       |
| Graphite/carbon NPs/Cu/PTFE electrode                      | KOH (7 M)                              | -0.55 V             | 100                            | 70%            | [6]       |
| Truncated-octahedral Cu <sub>2</sub> O                     | KHCO <sub>3</sub> (0.5M)               | -1.1 V              | ≈37                            | 59%            | [7]       |
| Branched CuO nanoparticles                                 | KHCO <sub>3</sub> (0.1M)               | -1.05 V             | ≈25.3                          | 68%            | [8]       |
| Electrochemical fragmented Cu <sub>2</sub> O nanoparticles | KHCO <sub>3</sub> (0.1M)               | -1.1 V              | ≈17.5                          | 27% to 57.3%   | [9]       |
| Cu <sub>3</sub> N-derived Cu nanowires                     | KHCO <sub>3</sub> (0.1M)               | -1.0 V              | ≈56.8                          | 66%            | [10]      |
| CuCl-derived Cu                                            | KHCO <sub>3</sub> (0.05M)              | -2.6 V vs. Ag/AgCl  | 17                             | 56%            | [11]      |
| HKUST-1-derived Cu cluster                                 | KOH (0.1 M)                            | -1.07 V             | 262                            | 45%            | [12]      |
| Phase-separated CuPd                                       | KOH (0.1 M)                            | -0.74 V             | 360.5                          | ≈48%           | [13]      |
| CuAg wire (Ag 6%)                                          | KOH (1 M)                              | -0.68 V             | ≈300                           | 55.20%         | [14]      |
| Dealloyed Cu–Al                                            | KOH (1 M)                              | -1.5 V              | 400                            | 80%            | [15]      |
| B-doped Cu                                                 | KHCO <sub>3</sub> (0.1M)               | -1.1 V              | 70                             | 53%            | [16]      |
| F-modified Cu                                              | KOH (0.75 M)                           | -0.89 V             | 1600                           | 65%            | [17]      |
| Cu–PANI nanocatalyst                                       | KHCO <sub>3</sub> (0.1M)               | -1.13 V             | 34.7                           | 48.80%         | [18]      |
| EDTA-modified porous hollow Cu microspheres                | KHCO <sub>3</sub> (0.1M)               | -0.82 V             | ≈7.5                           | 50.10%         | [19]      |
| N-Aryl-dihydropyridine-based oligomer modified Cu          | KHCO <sub>3</sub> (1M)                 | -0.83 V             | 319                            | 72%            | [20]      |
| Cu <sub>3</sub> N NPs with both (100) and (111) facets     | KHCO <sub>3</sub> (0.1M)               | -0.8 V              | 60                             | 61.1%          | This work |

[1] A. Loiudice, P. Lobaccaro, E. A. Kamali, T. Thao, B. H. Huang, J. W. Ager and R. Buonsanti, *Angew. Chem., Int. Ed.*, 2016, **55**, 5789.

[2] P. Grosse, D. Gao, F. Scholten, I. Sinev, H. Mistry and B. R. Cuenya, *Angew. Chem., Int. Ed.*, 2018, **57**, 6192.

[3] D. Gao, I. Zegkinoglou, N. J. Divins, F. Scholten, I. Sinev, P. Grosse and B. R. Cuenya, *ACS Nano*, 2017, **11**, 4825.

[4] C. Choi, T. Cheng, M. F. Espinosa, H. Fei, X. Duan, W. A. Goddard and Y. Huang, *Adv. Mater.*, 2019, **31**, 1805405.

- [5] B. Zhang, J. Zhang, M. Hua, Q. Wan, Z. Su, X. Tan, L. Liu, F. Zhang, G. Chen, D. Tan, X. Cheng, B. Han, L. Zheng and G. Mo, *J. Am. Chem. Soc.*, 2020, **142**, 13606.
- [6] C. T. Dinh, T. Burdyny, M. G. Kibria, A. Seifitokaldani, C. M. Gabardo, F. P. García de Arquer, A. Kiani, J. P. Edwards, P. De Luna, O. S. Bushuyev, C. Zou, R. Quintero-Bermudez, Y. Pang, D. Sinton and E. H. Sargent, *Science*, 2018, **360**, 783.
- [7] Y. Gao, Q. Wu, X. Liang, Z. Wang, Z. Zheng, P. Wang, Y. Liu, Y. Dai, M. H. Whangbo and B. Huang, *Adv. Sci.*, 2020, **7**, 1902820.
- [8] J. Kim, W. Choi, J. W. Park, C. Kim, M. Kim and H. Song, *J. Am. Chem. Soc.*, 2019, **141**, 6986.
- [9] H. Jung, S. Y. Lee, C. W. Lee, M. K. Cho, D. H. Won, C. Kim, H. S. Oh, B. K. Min and Y. J. Hwang, *J. Am. Chem. Soc.*, 2019, **141**, 4624.
- [10] Y. Mi, S. Shen, X. Peng, H. Bao, X. Liu, J. Luo, *ChemElectroChem*, 2019, **6**, 2393.
- [11] M. G. Kibria, C. T. Dinh, A. Seifitokaldani, P. D. Luna, T. Burdyny, R. Q. Bermudez, M. B. Ross, O. S. Bushuyev, F. P. García de Arquer, P. Yang, D. Sinton and E. H. Sargent, *Adv. Mater.*, 2018, **30**, 1804867.
- [12] D. H. Nam, O. S. Bushuyev, J. Li, P. De Luna, A. Seifitokaldani, C. T. Dinh, F. P. García de Arquer, Y. Wang, Z. Liang, A. H. Proppe, C. S. Tan, P. Todorović, O. Shekhah, C. M. Gabardo, J. W. Jo, J. Choi, M.-J. Choi, S.-W. Baek, J. Kim, D. Sinton, S. O. Kelley, M. Eddaoudi and E. H. Sargent, *J. Am. Chem. Soc.*, 2018, **140**, 11378.
- [13] S. Ma, M. Sadakiyo, M. Heima, R. Luo, R. T. Haasch, J. I. Gold, M. Yamauchi and P. J. A. Kenis, *J. Am. Chem. Soc.*, 2017, **139**, 47.
- [14] T. T. H. Hoang, S. Verma, S. Ma, T. T. Fister, J. Timoshenko, A. I. Frenkel, P. J. A. Kenis and A. A. Gewirth, *J. Am. Chem. Soc.*, 2018, **140**, 5791.
- [15] M. Zhong, K. Tran, Y. Min, C. Wang, Z. Wang, C.-T. Dinh, P. De Luna, Z. Yu, A. S. Rasouli, P. Brodersen, S. Sun, O. Voznyy, C. S. Tan, M. Askerka, F. Che, M. Liu, A. Seifitokaldani, Y. Pang, S. C. Lo, A. Ip, Z. Ulissi and E. H. Sargent, *Nature*, 2020, **581**, 178.
- [16] Y. Zhou, F. Che, M. Liu, C. Zou, Z. Liang, P. De Luna, H. Yuan, J. Li, Z. Wang, H. Xie, H. Li, P. Chen, E. Bladt, R. Q. Bermudez, T. K. Shan, S. Bals, J. Hofkens, D. Sinton, G. Chen and E. H. Sargent, *Nat. Chem.*, 2018, **10**, 974.
- [17] W. Ma, S. Xie, T. Liu, Q. Fan, J. Ye, F. Sun, Z. Jiang, Q. Zhang, J. Cheng and Y. Wang, *Nat. Catal.*, 2020, **3**, 478.
- [18] X. Wei, Z. Yin, K. Lyu, Z. Li, J. Gong, G. Wang, L. Xiao, J. Lu, L. Zhuang, *ACS Catal.*, 2020, **10**, 4103.
- [19] J. Liu, J. Fu, Y. Zhou, W. Zhu, L. P. Jiang, Y. Lin, *Nano Lett.*, 2020, **20**, 4823.
- [20] F. Li, A. Thevenon, A. Rosas-Hernández, Z. Wang, Y. Li, C. M. Gabardo, A. Ozden, C. T. Dinh, J. Li, Y. Wang, J. P. Edwards, Y. Xu, C. McCallum, L. Tao, Z. Q. Liang, M. Luo, X. Wang, H. Li, C. P. O'Brien, C. S. Tan, D. H. Nam, R. Q. Bermudez, T. T. Zhuang, Y. C. Li, Z. Han, R. D. Britt, D. Sinton, T. Agapie, J. C. Peters and E. H. Sargent, *Nature*, 2020, **577**, 509.
